# Supplementary material for: Statistical Methodologies for the Optimization of Lipase and Biosurfactant by Ochrobactrum intermedium Strain MZV101 in an Identical Medium for Detergent Applications
Source: MDPI journal article supplement (doi:10.3390/molecules22091460), 2017-09-11
Supplement: s1 [file s1]

---

## EDITORIAL CERTIFICATE LETTER

---

This document is to certify that the manuscript listed below was edited for proper English language, grammar, punctuation, spelling, and overall style by one of the highly qualified subject-expert native English speaking editors at **NativeEnglishEdit.com**

The substantive content of the article mentioned below remains the full responsibility of the author/authors:

TITLE OF ARTICLE:

STATISTICAL METHODOLOGY FOR OPTIMIZATION OF LIPASE AND BIOSURFACTANT BY *OCHROBACTRUM INTERMEDIUM* STRAINMZV101 IN THE SAME MEDIA FOR DETERGENT APPLICATION

AUTHOR(S):

MINA ZARINVIARSAGH , GHOLAMHOSSEIN EBRAHIMIPOR , HOSSIEN SADEGHI

REFER CODE:

EE-1396-2224920 ZARIN

---

Documents receiving this certification should be English-ready for publication; however, the author has the ability to accept or reject our suggestions and changes.

This certificate may be verified at:

Native English Edit

[www.birminghamresearchpark.co.uk/tenants/native-english-edit](http://www.birminghamresearchpark.co.uk/tenants/native-english-edit)

[www.NativeEnglishEdit.com](http://www.NativeEnglishEdit.com)

Birmingham Research Park  
Edgbaston  
Birmingham B15 2SQ  
United Kingdom
